# Supplementary material for: Deep Sequencing Analysis of miRNA Expression in Breast Muscle of Fast-Growing and Slow-Growing Broilers
Source: PubMed Central journal article supplement (PMC4519947; doi:10.3390/ijms160716242), 2015-07-17
Supplement: ijms-16-16242-s001.pdf [file ijms-16-16242-s001.pdf]

## Supplementary Information

**Table S1.** Statistics of miRNA amounts detected from small RNA deep sequencing.

| Sample | Amount of miRNAs | Total Numbers | Shared Numbers |
|--------|------------------|---------------|----------------|
| WRRh   | 780 (152)        | 891 (170)     | 680(147)       |
| WRRl   | 791 (165)        |               |                |
| XHh    | 718 (133)        | 797 (165)     | 671 (109)      |
| XHl    | 750 (141)        |               |                |

The value in brackets is the number of novel miRNAs. WRRh, WRRl, XHh, and XHl indicated the group of Recessive White Rock with high body weight, Recessive White Rock with low body weight, Xinhua Chickens with high body weight, and Xinhua Chickens with low body weight, respectively.

**Table S2.** Novel miRNAs have read counts more than 1000 reads in the libraries.

| miRNA   | Read Counts | Chromosome | Strand | Star        | End         |
|---------|-------------|------------|--------|-------------|-------------|
| 15_2275 | 854,769     | 15         | -      | 473,792     | 473,870     |
| 1_6441  | 27,093      | 1          | -      | 130,059,859 | 130,059,906 |
| 2_9878  | 6819        | 2          | -      | 131,256,102 | 131,256,146 |
| 3_11306 | 5729        | 3          | -      | 95,198,063  | 95,198,113  |
| Z_18074 | 4786        | Z          | -      | 71,507,867  | 71,507,915  |
| Z_17969 | 4779        | Z          | -      | 42,745,528  | 42,745,607  |
| 4_12521 | 1528        | 4          | -      | 91,911,592  | 91,911,653  |
| 4_11967 | 1186        | 4          | +      | 92,169,305  | 92,169,366  |
| 3_11169 | 1062        | 3          | -      | 68,697,828  | 68,697,899  |
| 5_12580 | 1032        | 5          | +      | 5,381,982   | 5,382,053   |

**Table S3.** Details of shared differentially expressed miRNAs among four contrasts.

| Conjoint Contrast           | Differentially Expressed miRNAs                                                                                                                                                                                                                                                                                                                                                                                                                                                                                                                                                                                                                                                                                                                                                                                       | Amount |
|-----------------------------|-----------------------------------------------------------------------------------------------------------------------------------------------------------------------------------------------------------------------------------------------------------------------------------------------------------------------------------------------------------------------------------------------------------------------------------------------------------------------------------------------------------------------------------------------------------------------------------------------------------------------------------------------------------------------------------------------------------------------------------------------------------------------------------------------------------------------|--------|
| WRRh vs. WRRl & XHh vs. XHl | 1_4060, 1_4903, 1_5489, 10_133, 14_1786, 17_2567, 18_3584, 2_9448, 20_7112, 24_7725, 24_7726, 28_8412, 3_11092, 4_11437, 4_11488, 4_12339, 4_12341, 6_13832, 6_14144, Z_17439, Z_17672, Z_18026, miR-1416-3p, miR-146b-5p, miR-1736-5p, miR-1744-3p, miR-1751-5p, miR-1756a, miR-1791-3p, miR-205b, miR-460b-3p, miR-460b-5p, miR-6544-5p, miR-9-5p                                                                                                                                                                                                                                                                                                                                                                                                                                                                   | 54     |
| WRRh vs. XHh & WRRl vs. XHl | 1_4836, 1_5155, 1_5163, 1_5364, 1_5442, 1_5571, 1_5572, 1_6316, 1_6441, 1_6464, 1_6603, 1_6696, 1_6743, 10_168, 10_237, 11_641, 13_1554, 14_1780, 14_1987, 15_2097, 15_2173, 19_3786, 19_3829, 2_8666, 2_8901, 2_8915, 2_8923, 2_8924, 2_9621, 2_9815, 20_6874, 20_6890, 20_6954, 20_6992, 20_7045, 21_7211, 21_7222, 21_72124, 24_7682, 28_8325, 28_8457, 3_10168, 3_10670, 4_11479, 4_11670, 4_11987, 4_12193, 4_12255, 4_12363, 4_12411, 5_13090, 5_13621, 5_13622, 8_16601, Z_17715, miR-1329-5p, miR-142-5p, miR-146b-3p, miR-155, miR-1603, miR-1635, miR-1648-5p, miR-1674, 1684b-3p, miR-1716, miR-1747, miR-184, miR-194, miR-200a, miR-200b, miR-21, miR-222b-3p, miR-222b-5p, miR-223, miR-34b, miR-34c, miR-3524a, miR-3529, miR-458a-3p, miR-6557-3p, miR-6570-5p, miR-6586-5p, miR-6677-5p, miR-6681-5p | 84     |

**Table S3.** *Cont.*

| Conjoint Contrast  | Differentially Expressed miRNAs                                                                                                                                                                                                                              | Amount |
|--------------------|--------------------------------------------------------------------------------------------------------------------------------------------------------------------------------------------------------------------------------------------------------------|--------|
| All Four Contrasts | 1_6510, 15_2093, 19_3787, 23_7539, 24_7684, 26_7910, 26_8039, 26_8040, 4_11833, 4_12372, 5_12997, 5_13077, 7_15435, Z_17414, Z_18085, Z_18086, miR-122, miR-1329-3p, miR-1587, miR-1736-3p, miR-1769-3p, miR-1769-5p, miR-1773-5p, miR-205a, miR-31, miR-375 | 26     |

WRRh vs. WRRl indicated the comparison between the two-tail samples of Recessive White Rock; XHh vs. XHl indicated the comparison between the two-tail samples of Xinhua Chickens; WRRh vs. XHh indicated the comparison between the groups of Recessive White Rock and Xinhua Chickens with high body weight; WRRl vs. XHl indicated the comparison between the groups of Recessive White Rock and Xinhua Chickens with low body weight.

**Table S4.** Top 29 GO terms of gene counts over 1,000 for target genes of all differentially expressed miRNAs.

| No. | GO Terms                                 | GO Accession | Gene Numbers | <i>p</i> Value         |
|-----|------------------------------------------|--------------|--------------|------------------------|
| 1   | protein binding                          | GO:0005515   | 2530         | $1.30 \times 10^{-30}$ |
| 2   | cytoplasm                                | GO:0005737   | 1669         | $1.90 \times 10^{-25}$ |
| 3   | cytoplasmic part                         | GO:0044444   | 1058         | $1.30 \times 10^{-15}$ |
| 4   | cellular process                         | GO:0009987   | 3395         | $8.40 \times 10^{-11}$ |
| 5   | membrane-bounded organelle               | GO:0043227   | 1924         | $3.10 \times 10^{-8}$  |
| 6   | intracellular membrane-bounded organelle | GO:0043231   | 1921         | $3.60 \times 10^{-8}$  |
| 7   | binding                                  | GO:0005488   | 5116         | $4.60 \times 10^{-8}$  |
| 8   | localization                             | GO:0051179   | 1106         | $9.40 \times 10^{-8}$  |
| 9   | cellular metabolic process               | GO:0044237   | 2107         | $1.10 \times 10^{-7}$  |
| 10  | intracellular part                       | GO:0044424   | 2720         | $1.50 \times 10^{-7}$  |
| 11  | cellular macromolecule metabolic process | GO:0044260   | 1558         | $1.50 \times 10^{-6}$  |
| 12  | biological regulation                    | GO:0065007   | 2107         | $9.10 \times 10^{-6}$  |
| 13  | membrane part                            | GO:0044425   | 1635         | $1.20 \times 10^{-5}$  |
| 14  | macromolecule metabolic process          | GO:0043170   | 1804         | $1.70 \times 10^{-5}$  |
| 15  | regulation of biological process         | GO:0005789   | 2006         | $2.60 \times 10^{-5}$  |
| 16  | intracellular                            | GO:0005622   | 3173         | $2.90 \times 10^{-5}$  |
| 17  | nucleotide binding                       | GO:0000166   | 1171         | $4.00 \times 10^{-5}$  |
| 18  | regulation of cellular process           | GO:0050794   | 1922         | $6.20 \times 10^{-5}$  |
| 19  | intrinsic to membrane                    | GO:0031224   | 1357         | $6.90 \times 10^{-5}$  |
| 20  | metabolic process                        | GO:0008152   | 2802         | $1.20 \times 10^{-4}$  |
| 21  | protein metabolic process                | GO:0019538   | 1172         | $1.20 \times 10^{-4}$  |
| 22  | integral to membrane                     | GO:0016021   | 1308         | $1.70 \times 10^{-4}$  |
| 23  | primary metabolic process                | GO:0044238   | 2302         | $1.90 \times 10^{-4}$  |
| 24  | organelle                                | GO:0043226   | 2251         | $6.00 \times 10^{-4}$  |
| 25  | intracellular organelle                  | GO:0043229   | 2247         | $7.00 \times 10^{-4}$  |
| 26  | catalytic activity                       | GO:0003824   | 2625         | $1.70 \times 10^{-3}$  |
| 27  | cell                                     | GO:0005623   | 4723         | $2.00 \times 10^{-3}$  |
| 28  | cell part                                | GO:0044464   | 4723         | $2.00 \times 10^{-3}$  |
| 29  | nucleus                                  | GO:0005634   | 1249         | $6.40 \times 10^{-3}$  |

**Table S5.** Enriched KEGG pathways for target gene of differently expressed miRNA identified in the four contrasts.

| <b>Class</b>         | <b>ID</b> | <b>Pathways</b>                             | <b>p Value</b> |
|----------------------|-----------|---------------------------------------------|----------------|
| <b>WRRh vs. WRRl</b> | gga04142  | Lysosome                                    | 0.0023         |
|                      | gga01100  | Metabolic pathways                          | 0.0061         |
|                      | gga00052  | Galactose metabolism                        | 0.0078         |
|                      | gga00280  | Valine, leucine and isoleucine degradation  | 0.0078         |
|                      | gga00511  | Other glycan degradation                    | 0.0093         |
|                      | gga00600  | Sphingolipid metabolism                     | 0.0123         |
|                      | gga00270  | Cysteine and methionine metabolism          | 0.0137         |
|                      | gga00510  | N-Glycan biosynthesis                       | 0.0151         |
|                      | gga04620  | Toll-like receptor signaling pathway        | 0.0205         |
|                      | gga00230  | Purine metabolism                           | 0.0244         |
|                      | gga04141  | Protein processing in endoplasmic reticulum | 0.0256         |
|                      | gga03040  | Spliceosome                                 | 0.0292         |
|                      | gga04145  | Phagosome                                   | 0.0327         |
| <b>WRRh vs. XHh</b>  | gga00052  | Galactose metabolism                        | 0.0044         |
|                      | gga00280  | Valine, leucine and isoleucine degradation  | 0.0044         |
|                      | gga04744  | Phototransduction                           | 0.0053         |
|                      | gga00511  | Other glycan degradation                    | 0.0053         |
|                      | gga00600  | Sphingolipid metabolism                     | 0.0070         |
|                      | gga01100  | Metabolic pathways                          | 0.0116         |
|                      | gga04142  | Lysosome                                    | 0.0127         |
|                      | gga00230  | Purine metabolism                           | 0.0143         |
| <b>WRRl vs. XHl</b>  | gga04142  | Lysosome                                    | 0.0003         |
|                      | gga01100  | Metabolic pathways                          | 0.0045         |
|                      | gga00052  | Galactose metabolism                        | 0.0095         |
|                      | gga00280  | Valine, leucine and isoleucine degradation  | 0.0095         |
|                      | gga00511  | Other glycan degradation                    | 0.0113         |
|                      | gga00600  | Sphingolipid metabolism                     | 0.0148         |
|                      | gga00270  | Cysteine and methionine metabolism          | 0.0165         |
|                      | gga00510  | N-Glycan biosynthesis                       | 0.0182         |
|                      | gga04620  | Toll-like receptor signaling pathway        | 0.0245         |
|                      | gga04110  | Cell cycle                                  | 0.0260         |
|                      | gga00230  | Purine metabolism                           | 0.0290         |
|                      | gga04141  | Protein processing in endoplasmic reticulum | 0.0304         |
|                      | gga03040  | Spliceosome                                 | 0.0345         |
|                      | gga04145  | Phagosome                                   | 0.0384         |
|                      | gga04144  | Endocytosis                                 | 0.0498         |

**Table S5. Cont.**

| <b>Class</b>       | <b>ID</b> | <b>Pathways</b>                            | <b>p Value</b> |
|--------------------|-----------|--------------------------------------------|----------------|
| <b>XHh vs. XHl</b> | gga00280  | Valine, leucine and isoleucine degradation | 0.0002         |
|                    | gga04142  | Lysosome                                   | 0.0023         |
|                    | gga01100  | Metabolic pathways                         | 0.0061         |
|                    | gga00052  | Galactose metabolism                       | 0.0078         |
|                    | gga04744  | Phototransduction                          | 0.0093         |
|                    | gga00511  | Other glycan degradation                   | 0.0093         |
|                    | gga00600  | Sphingolipid metabolism                    | 0.0123         |
|                    | gga00270  | Cysteine and methionine metabolism         | 0.0137         |
|                    | gga04270  | Vascular smooth muscle contraction         | 0.0218         |
|                    | gga04110  | Cell cycle                                 | 0.0218         |
|                    | gga04145  | Phagosome                                  | 0.0327         |
|                    | gga04530  | Tight junction                             | 0.0449         |

WRRh vs. WRRl indicated the comparison between the two-tail samples of Recessive White Rock; XHh vs. XHl indicated the comparison between the two-tail samples of Xinhua Chickens; WRRh vs. XHh indicated the comparison between the groups of Recessive White Rock and Xinhua Chickens with high body weight; WRRl vs. XHl indicated the comparison between the groups of Recessive White Rock and Xinhua Chickens with low body weight.

**Table S6. Detail of miRNA quantitative real-time PCR primer.**

| <b>Gene</b>            | <b>Primer Sequence (5' to 3')</b>                | <b>Annealing Temp (°C)</b> |
|------------------------|--------------------------------------------------|----------------------------|
| <b>gga-miR-223</b>     | F: GTGTCAGTTTGTCAAATACCCCAA                      | 56                         |
| <b>gga-miR-142-5p</b>  | F: GCCCATAAAGTAGAAAGCACTACAA                     | 56                         |
| <b>gga-miR-205a</b>    | F: CCTTCATTCCACCGGAGTCTG                         | 56                         |
| <b>gga-miR-222b-5p</b> | F: GCTCAGTAGTCAGTGTAGGATCTG                      | 56                         |
| <b>U6</b>              | F: GCAGGGCCATGCTAATCTTCTCTGTATCG                 | 56                         |
| <b>GHR</b>             | F: TTCAACACATCCTACACCTCG R: TGGTGGTGGATCCCATCGTA | 60                         |
| <b>GAPDH</b>           | F: TATGATTCTACACACGGAC R: ATGGTGGTGAAGACACCAGTG  | 60                         |

F means forward primer; R means reverse primer.

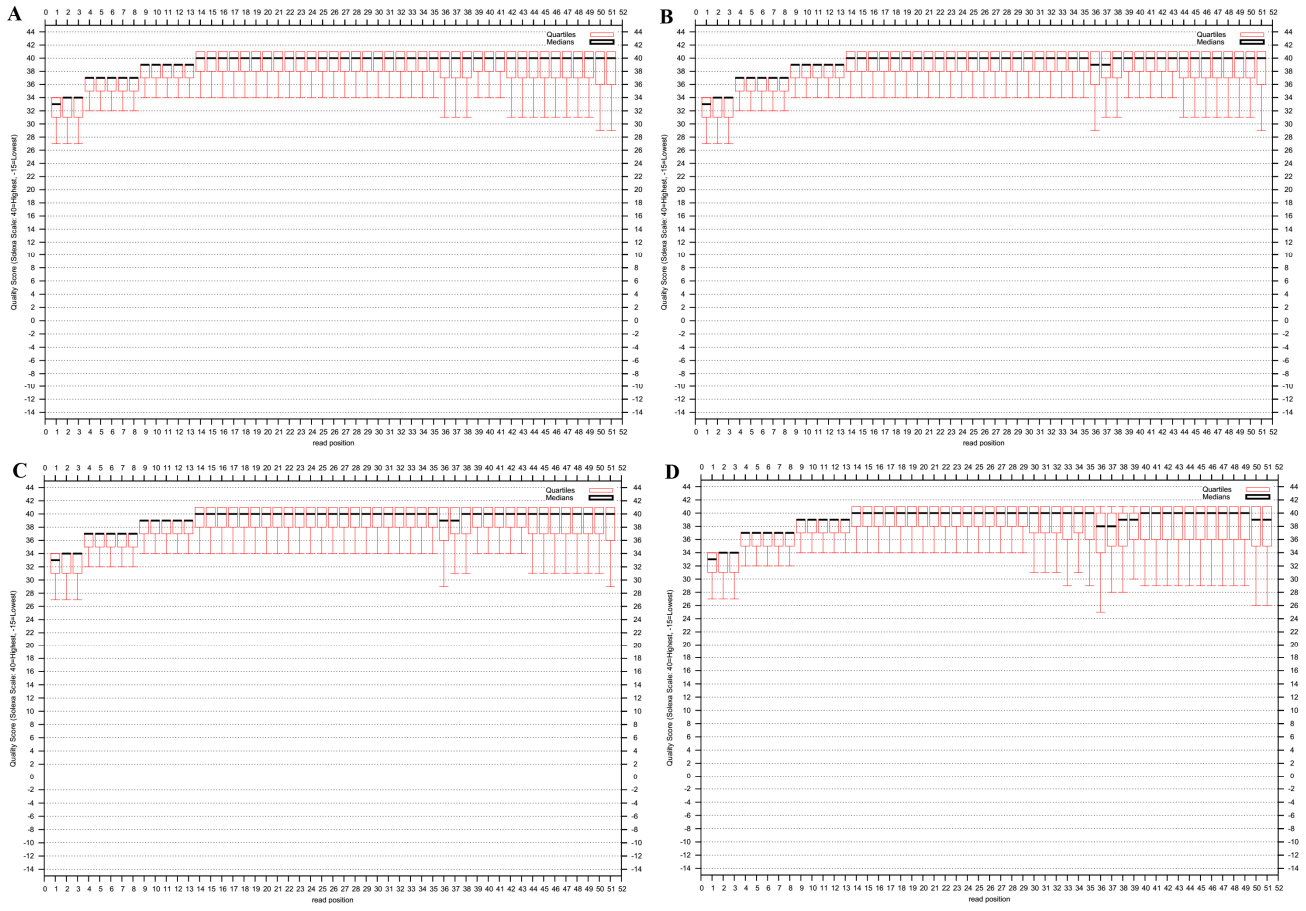

**Figure S1.** The quality data for RNA samples. **(A)** WRRh (Recessive White Rock with high body weight); **(B)** WRRl (Recessive White Rock with low body weight); **(C)** XHh (Xinhua Chickens with high body weight); **(D)** XHl (Xinhua Chickens with low body weight). Horizontal axis means base of reads 1–51 from 5' to 3'; vertical axis means quality value of base. Red boxes means quartiles of reads quality, and black bold lines means medians of reads quality. The higher the medians, the lower the error rate of sequencing.
